# Supplementary material
Source: MDPI journal article supplement (https://www.mdpi.com/2311-5637/9/8/761)
Supplement: s1 [file s1]

# Supplementary Materials: The following are available online at [www.mdpi.com/xxx/s1](http://www.mdpi.com/xxx/s1),

**Table S1.** Comparison of lactic acid production from *Weizmannia coagulans* (formerly *Bacillus coagulans*).

| Microorganism                          | Substrate | Optical isomer | Process organization   | Lactic acid, g/l | Yield, g/g sugar | Reference                 |
|----------------------------------------|-----------|----------------|------------------------|------------------|------------------|---------------------------|
| <i>W. coagulans</i> MA42               | xylose    | L (+)-LA       | Batch-Erlenmeyer flask | 7.88             | 0.79             | This study                |
| <i>W. coagulans</i> P13                | xylose    | L (+)-LA       | Batch-Erlenmeyer flask | 6.76             | 0.68             | This study                |
| <i>W. coagulans</i> S5                 | xylose    | L (+)-LA       | Batch-Erlenmeyer flask | 7.13             | 0.71             | This study                |
| <i>B. coagulans</i> NL01               | xylose    | L (+)-LA       | Batch-Erlenmeyer flask | 75.0             | 0.75             | Ouyang et al. [56]        |
| <i>B. coagulans</i> LA204              | xylose    | N/D            | Batch-bioreactor       | 43.72            | 0.88             | Hu et al., [17]           |
| <i>B. coagulans</i> C106               | xylose    | L (+)-LA       | Batch-bioreactor       | 118.4            | 0.78             | Ye et al., [7]            |
| <i>B. coagulans</i> Azu-10             | xylose    | N/D            | Batch-bioreactor       | 50.70            | 0.99             | Abdel-Rahman et al., [57] |
| <i>W. coagulans</i> PP-18 <sup>T</sup> | glucose   | L (+)-LA       | Batch-Erlenmeyer flask | 45.35            | 0.64             | Tolieng et al., [58]      |
| <i>W. coagulans</i> JC-4               | glucose   | L (+)-LA       | Batch-Erlenmeyer flask | 45.70            | 0.63             | Tolieng et al., [58]      |

N/D—not described.

**Table S2.** The chemical composition (%) of lignocellulose biomass.

| Lignocellulose biomass | Treatment                            | Compositions (% dry weight) |               |            | Total carbohydrate (g) <sup>a</sup> |
|------------------------|--------------------------------------|-----------------------------|---------------|------------|-------------------------------------|
|                        |                                      | Cellulose                   | Hemicellulose | Lignin     |                                     |
| Sugarcane bagasse      | Untreated                            | 43.77±2.51                  | 24.32±1.25    | 23.00±0.56 | 1.28                                |
|                        | 0.25M H <sub>2</sub> SO <sub>4</sub> | 46.00±1.45                  | 20.67±1.37    | 22.50±0.95 | 0.56                                |
|                        | 0.05M H <sub>2</sub> SO <sub>4</sub> | 38.67±2.18                  | 25.00±1.87    | 23.10±0.39 | 0.95                                |
|                        | 0.25M NaOH                           | 50.67±1.09                  | 16.00±2.11    | 20.00±0.89 | 0.93                                |
|                        | 0.05M NaOH                           | 42.00±2.17                  | 23.00±1.96    | 23.00±0.46 | 0.98                                |
| Sugarcane trash        | Untreated                            | 40.15±2.98                  | 23.85±1.03    | 26.00±0.64 | 1.08                                |
|                        | 0.25M H <sub>2</sub> SO <sub>4</sub> | 45.33±1.93                  | 17.00±1.09    | 21.00±0.47 | 0.59                                |
|                        | 0.05M H <sub>2</sub> SO <sub>4</sub> | 40.67±2.08                  | 20.00±1.24    | 26.00±0.56 | 1.02                                |
|                        | 0.25M NaOH                           | 47.33±1.56                  | 14.33±0.97    | 11.00±0.73 | 0.56                                |
|                        | 0.05M NaOH                           | 41.33±1.34                  | 18.33±1.12    | 17.00±0.52 | 0.79                                |
| Corn stover            | Untreated                            | 42.08±2.13                  | 23.79±0.35    | 21.00±0.37 | 1.12                                |
|                        | 0.25M H <sub>2</sub> SO <sub>4</sub> | 47.33±1.96                  | 20.00±0.57    | 25.00±0.32 | 0.75                                |
|                        | 0.05M H <sub>2</sub> SO <sub>4</sub> | 44.00±2.02                  | 25.33±0.82    | 28.50±0.27 | 1.01                                |
|                        | 0.25M NaOH                           | 49.33±1.48                  | 15.33±0.46    | 16.00±0.53 | 0.73                                |
|                        | 0.05M NaOH                           | 47.00±1.19                  | 20.33±0.69    | 20.00±0.45 | 0.95                                |
| Rice straw             | Untreated                            | 37.29±1.55                  | 27.65±1.28    | 26.00±0.57 | 1.17                                |
|                        | 0.25M H <sub>2</sub> SO <sub>4</sub> | 44.67±1.23                  | 23.33±1.12    | 26.50±0.42 | 0.46                                |
|                        | 0.05M H <sub>2</sub> SO <sub>4</sub> | 42.00±1.42                  | 26.67±1.03    | 27.00±0.73 | 0.98                                |
|                        | 0.25M NaOH                           | 42.67±1.21                  | 19.67±1.58    | 22.00±0.61 | 0.98                                |
|                        | 0.05M NaOH                           | 39.33±1.57                  | 21.67±1.41    | 25.00±0.38 | 1.07                                |
| Water hyacinth         | Untreated                            | 45.40±1.22                  | 26.13±1.50    | 20.50±0.60 | 1.18                                |
|                        | 0.25M H <sub>2</sub> SO <sub>4</sub> | 47.33±0.97                  | 23.00±1.10    | 20.00±0.34 | 0.45                                |

|                                      |            |            |            |      |
|--------------------------------------|------------|------------|------------|------|
| 0.05M H <sub>2</sub> SO <sub>4</sub> | 44.67±1.12 | 25.33±1.73 | 20.30±0.52 | 0.78 |
| 0.25M NaOH                           | 46.00±1.09 | 22.00±1.24 | 16.00±0.63 | 0.45 |
| 0.05M NaOH                           | 45.33±1.11 | 23.33±1.07 | 18.00±0.71 | 0.81 |

<sup>a</sup>Total carbohydrate from 2.5 g lignocellulose biomass.

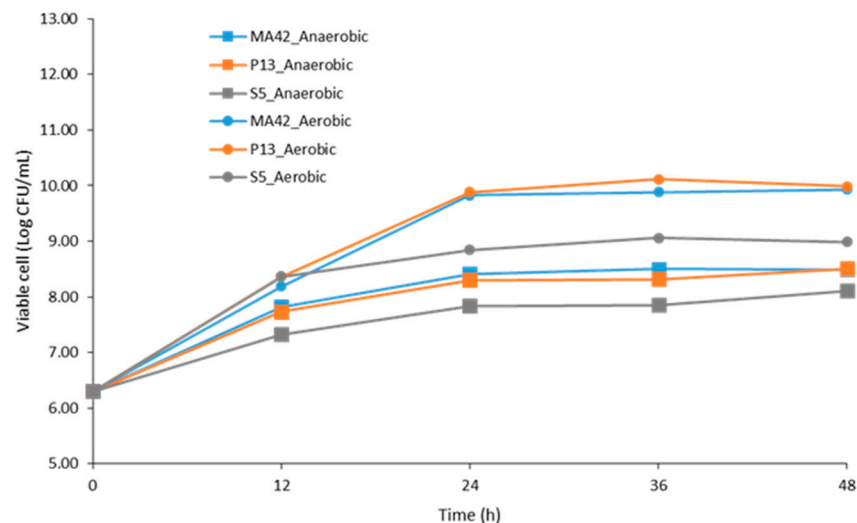

**Figure S1.** Effect of culture condition to growth of isolate MA42, P13 and S5 in aerobic and anaerobic fermentations.

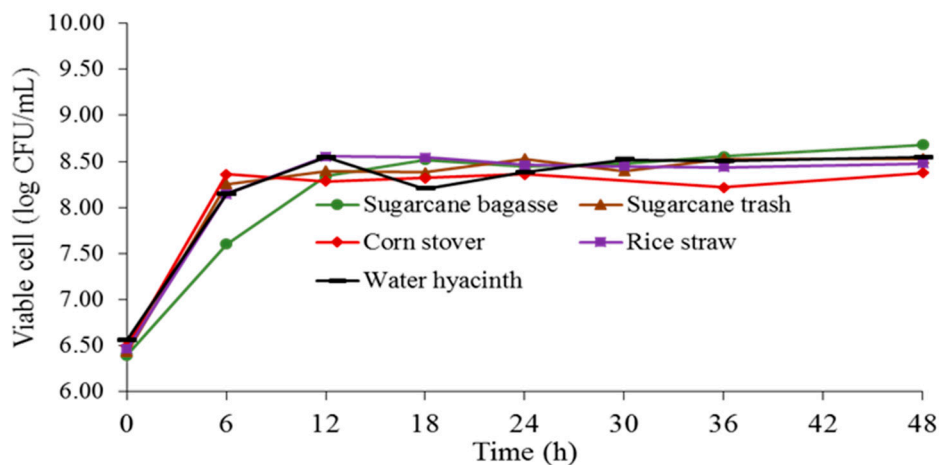

**Figure S2.** Growth efficiency from different lignocellulosic materials of *Weizmannia coagulans* MA42.
